# Supplementary material for: Airborne particulate matter monitoring in Kenya using calibrated low cost sensors
Source: Copernicus journal article supplement (doi:10.5194/acp-2018-327), 2018-05-14
Supplement: Supplementary file 1 [file acp-2018-327-supplement.pdf]

## Supplementary Material

### Airborne particulate matter monitoring in Kenya using calibrated low cost sensors

---

Francis D. Pope<sup>1\*</sup>, Michael Gatari<sup>2</sup>, David Ng'ang'a<sup>2</sup>, Alexander Poynter<sup>1</sup> and Rhiannon Blake<sup>1</sup>

<sup>1</sup>*School of Geography, Earth and Environmental Sciences, University of Birmingham, Birmingham, United Kingdom, B15 2TT.*

<sup>2</sup>*Institute of Nuclear Science and Technology, University of Nairobi, Nairobi, Kenya,*

*\*Corresponding author – [f.pope@bham.ac.uk](mailto:f.pope@bham.ac.uk)*

**Table S1** Mean average PM mass concentrations (PM<sub>1</sub>, PM<sub>2.5</sub> and PM<sub>10</sub>) and daily exceedances of the WHO PM guidelines (PM<sub>2.5</sub> and PM<sub>10</sub>) observed at the three measurement sites during the intensive period. <sup>1</sup>WHO guidelines for daily PM<sub>10</sub> and PM<sub>2.5</sub> are 50 and 25 µg/m<sup>3</sup>, respectively

| Measurement location | Measurement days (number) | Average PM <sub>1</sub> mass concentration (µg/m <sup>3</sup> ) | Average PM <sub>2.5</sub> mass concentration (µg/m <sup>3</sup> ) | Average PM <sub>10</sub> mass concentration (µg/m <sup>3</sup> ) | % daily PM <sub>2.5</sub> exceedances <sup>1</sup> | % daily PM <sub>10</sub> exceedances <sup>1</sup> |
|----------------------|---------------------------|-----------------------------------------------------------------|-------------------------------------------------------------------|------------------------------------------------------------------|----------------------------------------------------|---------------------------------------------------|
| Urban background     | 14                        | 17.1                                                            | 25.3                                                              | 62.6                                                             | 35.7                                               | 71.4                                              |
| Urban roadside       | 14                        | 33.0                                                            | 48.2                                                              | 120.6                                                            | 100.0                                              | 100.0                                             |
| Rural background     | 14                        | 11.6                                                            | 16.6                                                              | 23.4                                                             | 21.4                                               | 0.0                                               |

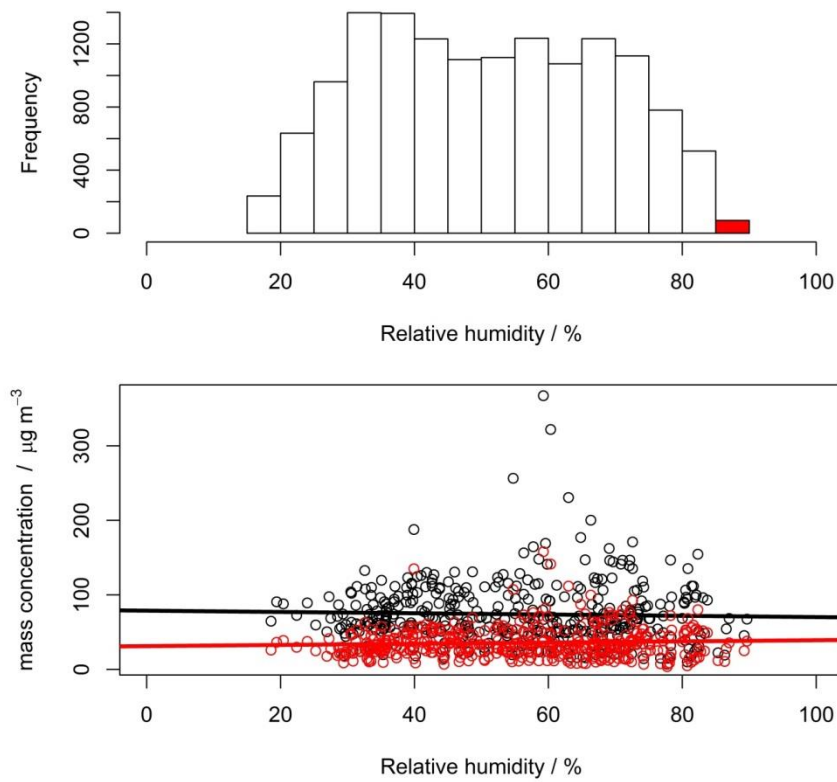

Figure S1. There is no dependence on recorded PM mass concentration upon RH. Top panel – histogram of recorded RH at the urban background site. The data with RH greater than 85% RH is shown in red and represents only 0.84% of the data recorded. Bottom panel – scatter plots of  $PM_{10}$  and  $PM_{2.5}$  versus RH for the urban background site. Black and red points represent  $PM_{10}$  and  $PM_{2.5}$  data, respectively. Neither site shows any significant dependence of PM concentration upon RH, as expected with respect to Crilley et al. 2018

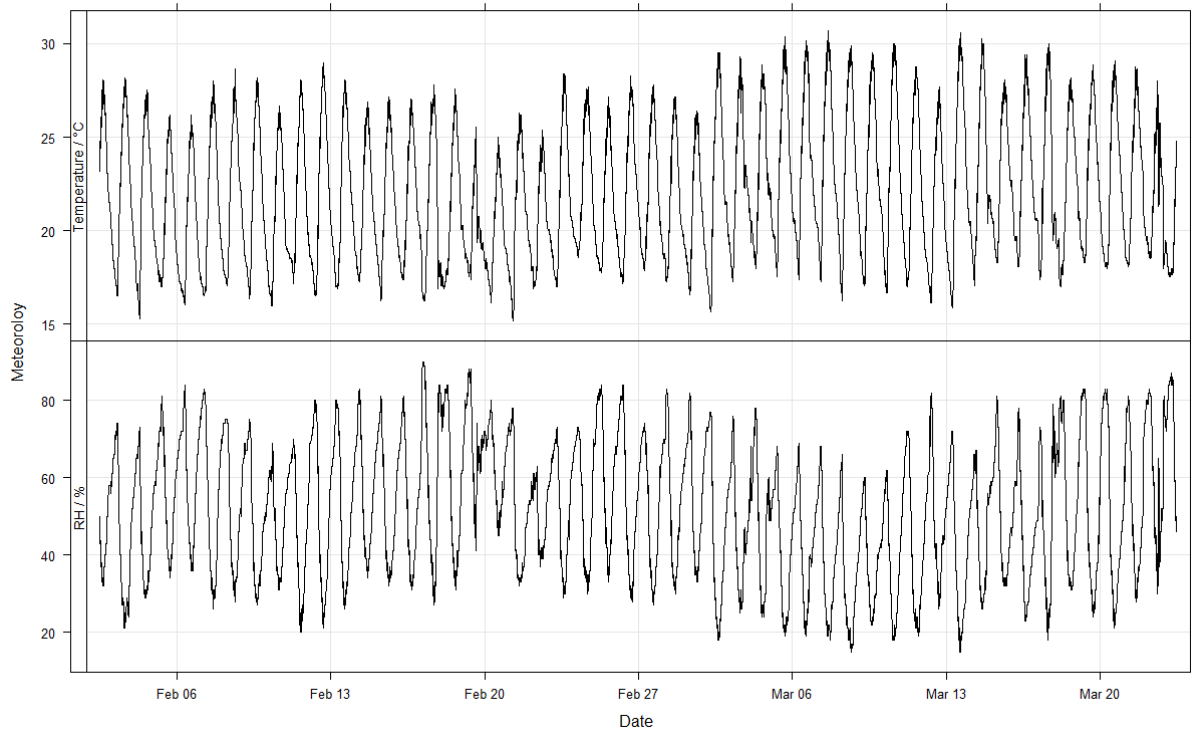

Figure S2. Time series for temperature and relative humidity data collected at the urban background field site in Nairobi.
